# Supplementary material for: Rapid isolation and resolution immune evasion and viral fitness across contemporary SARS-CoV-2 variants
Source: Research Square preprint supplement (doi:10.21203/rs.3.rs-1210846/v1), 2022-01-13
Supplement: Supplementary file 2 [file 65eb3cec0e7186241ab9c8d7.xlsx]

## Sheet: Table SI
Table S1: IC50 values of Vaccine sera against SARS-COV2 isolates in HAT-24.
	A2.2	B.1.319	Alpha	Beta	Gamma	Delta	Epsilon	Zeta	Eta	Kappa	Lambda	C36
D1	189.8	111.8	134.4	<	71.1	70.1	73.8	107.5	64.5	76.5	60.7	118.7
D2	175.2	93.9	113.5	<	60.9	69.9	64.4	93.5	48.1	70.4	62.1	93.2
D3	229	110.4	169.7	<	49.9	83.3	68.7	114.4	73	74.2	60.9	99.8
D4	265.6	158.4	181.3	63.4	101.1	110.1	93.2	189.9	116.5	103.6	69.4	170
D5	269.9	151	194.7	62.4	93.5	101.5	104.2	132	105.2	79.5	76	150
D6	261.3	118.5	123.3	<	73.2	69.5	52.9	128.8	42.1	74.3	74.8	123.7
D7	229.3	111.5	214.6	<	97.6	80.3	88.4	155.3	83.3	62.2	73.1	112.4
D8	1199	345.8	1624	159.8	290.5	228.3	250.9	377	264.3	185.7	169	393.5
D9	799.8	211.4	497.6	68.8	184.5	205	175.8	291.2	188.2	130.2	149.3	239.4
D10	1229	434.3	1092	157.8	344.6	339.5	286.7	411	343.5	236.3	239.8	482.3
D11	570.8	192.8	622.1	80.6	151.2	198.7	198.3	188	200.6	112.9	161.3	207.6
D12	411.3	180.6	297.3	78.6	155.5	129.2	129.5	160.5	111.5	80.7	98.9	221.7
D13	399.1	164.7	283.2	76.2	114.7	87.9	79.5	166.3	108.5	70.1	88	185.9
D72	229.4	208.4	198.6	99.2	148.6	99.3	79.1	148.6	66.6	79.1	77.7	164.3
D73	184.7	164.2	195.9	76.3	157.2	110.2	89.8	121.9	64.2	67.3	74.8	147.1
D74	156.8	156.1	215.7	76.1	93.5	89.7	40.1	88.4	20.5	72.9	59.6	143.5
D75	172.3	149.3	200.9	79.9	163.1	127.8	79.5	90.4	60.8	70	56.4	131.9
D76	258.8	251.7	245.7	92.9	205.7	225.6	165.9	169.7	128.1	147.7	144.1	232.3
D77	193.4	149.9	189.2	<	137.3	126.5	95.1	107.4	49.8	80.1	73.6	129.3
D78	73.3	59	96.2	<	70.1	<	<	<	<	<	<	70.2
D79	157.4	117.3	207	75.3	135.3	69.8	75.9	87.8	41.4	<	<	127.6
D80	602.2	402.7	748.5	200.7	479.4	411.8	326.6	342.4	288.4	234.1	228.1	453.7
D81	95.1	64.3	170.6	<	<	<	32.6	<	<	<	<	40.9
D82	114.5	72	130.4	<	143	67.3	25.2	30.3	36.9	<	<	62.1
< indicates limit of detection

## Sheet: Table S2
Table S2: IC50 values of convalescent sera against SARS-COV2 isolates in HAT-24.
	A2.2	B.1.319	Alpha	Beta	Gamma	Delta	Epsilon	Zeta	Eta	Kappa	Lambda	C36
AD015	434.1	297	557.1	40.2	122.1	200.5	498.1	162.6	212.7	128.9	72.5	436.7
AD016	929.5	451.5	732.4	563.2	532	1093	1114	507.3	527	930.9	690.4	1009
AD10	654	260.2	560.2	453.4	379.8	707.6	865	272.5	294.2	721.5	480.1	676.5
AD062	153.3	154.8	74.4	<	<	<	<	141.3	140.1	66	<	329.4
AD007	730	287.2	220.4	104.6	226.5	218.6	199.6	193.6	193.9	243.1	154.1	279
AD008	378.2	321.1	321.8	145.9	230.7	247.2	320.6	237.3	285.1	313.6	211.6	374.5
AD043	750	163.6	760	116.7	161.7	165.1	161.3	141.5	680	249.6	157.4	181.7
AD030	169.2	140.1	158.1	40.9	108.1	96.3	115.2	84.6	98.7	144	110.1	147.1
AD038	152.3	127.1	125.6	44.7	104.3	97.9	129.9	92.8	113.6	84.5	88.3	99.2
AD053	243.8	146.8	123.3	44.4	160.5	95.4	114.9	102.5	122.2	147.8	112.2	140.1
AD002	320	240	163.5	76.8	168.2	164.8	163.9	109.8	179.1	141.9	136.2	186.8
AD021	68	49.5	34.4	<	42.2	<	63.9	<	62.5	59.6	<	65.3
AD026	131.2	125.7	125.6	<	127.2	62.2	67.4	69.4	123.9	140	69.9	116.4
AD034	58.8	66.5	41.3	<	52.5	<	41.1	<	41	64.9	<	61.3
AD039	77.4	51.6	65.9	<	41.6	<	63.7	<	69.6	68.7	<	54.8
< indicates limit of detection

## Sheet: Table S3
Table S3: IC50 values of Vaccine sera against SARS-COV2 isolates in VeroE6.
	A2.2	B.1.319	Alpha	Beta	Gamma	Delta	Epsilon	Zeta	Eta	Kappa	Lambda	C36
D1	212.1	155.8	196.6	101	57.4	133.4	154	133.7	88.6	62.1	119	208.1
D2	102.4	92.7	122.5	58.3	44.6	70.3	84.9	113.6	78.5	<	107.1	148.3
D3	239	143.6	243	79.9	86.1	56.7	128.4	185.8	95	<	76.2	222.2
D4	307.5	170.8	229.6	<	134.6	148	220.9	180.6	189.4	127.9	223.1	370.5
D5	324.6	197.8	282.5	31.3	150.3	139.8	158.3	205.6	141.7	117.9	173.7	219.7
D6	370.2	66.1	220.9	<	41.6	44.1	113.8	151.2	38.2	<	88.5	217.7
D7	222	114.8	369.8	66.2	120.2	82.7	75.7	149.2	122.5	<	135.2	204.4
D8	752.1	537.6	1435	154.1	525.7	359	611	609.2	405.1	256.9	440.3	625.7
D9	621.2	313.2	730.6	33.7	269.9	308.4	439.1	268.7	303.8	141.5	305.6	439.3
D10	1074	609.4	1204	26.5	619.1	371.9	612.3	468.3	428.4	309.5	675.3	1035
D11	460.2	238.4	547.8	70.4	189.7	301.9	369	266	306	151.5	338.7	357.9
D12	510	222.5	391.1	44.3	165.1	203.2	260.7	255.7	283.6	121.1	190.1	314.6
D13	222.5	305.2	44.6	<	203.1	129.3	255.7	284.2	121	88.9	314.5	289.8
D14	198.3	155	371.3	14.76	223.7	113	133.9	161.5	94.79	<	131	278.1
D15	129.7	97.84	161.6	<	132.2	64.67	126.3	98.92	14.4	<	58.69	104.2
D16	129.3	104.4	181.4	35.65	78.31	28.14	43.04	78.32	21.04	<	61.93	128.5
D17	120	60	129.8	75.03	146.1	89.11	115.7	99.77	22.19	<	105.3	94.02
D18	222.2	197.1	235.8	57.09	152.3	291	241	200.7	166.3	72.57	273	264.5
D19	122.2	58	157.1	<	91.61	115.6	122.5	105.1	20.53	<	118.2	151.5
D20	<	<	31	<	<	<	<	<	<	<	<	55.1
D21	118.4	74.89	243.8	<	119.2	50.59	62.07	96.44	50.36	69.71	<	138.5
D22	400.2	338.8	743.2	142.8	465.8	464.3	524	369.3	315.7	209.4	330.6	308.6
D23	70.75	77.78	99.07	<	<	<	<	<	<	<	<	60.42
D24	61.85	46	130.6	<	66	43.19	36.75	44.9	<	15.04	18.14	77.57
< indicates limit of detection

## Sheet: Table S4
Table 4: IC50 values of convalescent sera against SARS-COV2 isolates in VeroE6.
	A2.2	B.1.319	Alpha	Beta	Gamma	Delta	Epsilon	Zeta	Eta	Kappa	Lambda	C36
AD015	1252	1218	1976	37.3	310.9	847.6	642.9	428.9	430.6	139.1	230	1023
AD016	1333	866.9	611.8	1330	1156	1420	1420	870.6	1420	598.1	1264	1088
AD10	814.6	450.8	1287	1294	805.6	1287	1473	574.8	821.8	411.8	970.5	570.8
AD062	616.8	497.3	542.2	66.3	152.7	128.4	<	423.7	428.9	84	<	520.1
AD007	329.1	636.5	410.8	121.5	326.2	264.4	324.9	302.4	243.5	225.5	241.5	337.6
AD008	418.1	635.6	353.4	140.3	282.1	321.8	353.4	313.6	267.1	206.4	338.1	640
AD043	288.7	335.7	288.7	101.9	353.9	335.7	335.7	168.4	236.1	161.4	170	315
AD030	170.9	167	163.7	108.1	149.3	115.9	140	121.8	95	17.7	111.4	180.5
AD038	178.4	173.8	169.9	<	165.7	120	161	157.9	134.7	37.4	95	162.2
AD053	312.8	312.6	312.6	99.5	169.8	134.6	150.6	156.8	152.1	77.5	117.6	166.1
AD002	202.2	516.2	158.8	96.5	311.4	155.6	167.5	165.4	158	103.6	135.7	283.5
AD021	53.2	41.5	41.4	41.4	42.1	40.7	40	<	79.4	<	<	48.1
AD026	160.6	129.9	123	50.2	41	61	66.5	61.4	60	41	41.1	94.3
AD034	71.1	41.2	63.7	34.7	62.5	50.7	50.3	52.4	40.8	42.4	63.4	77.8
AD039	42.1	42.3	42.3	<	121.2	40.9	65.5	42	<	<	41.3	42.3

## Sheet: Table S5
Table S5: Summary of NT50 values of Vaccine sera against SARS-COV2 isolates in HAT-24 and VeroE6.
	A2.2		B.1.319		Alpha		Beta		Gamma		Delta		Epsion		Zeta		Eta		Kappa		Lambda		C36
	HAT24	VeroE6	HAT24	VeroE6	HAT24	VeroE6	HAT24	VeroE6	HAT24	VeroE6	HAT24	VeroE6	HAT24	VeroE6	HAT24	VeroE6	HAT24	VeroE6	HAT24	VeroE6	HAT24	VeroE6	HAT24	VeroE6
D1	160	160	80	80	80	160	<40	<40	40	40	40	80	40	80	80	80	40	80	40	40	40	80	80	160
D2	160	160	80	80	80	80	<40	<40	40	40	40	40	40	80	80	80	40	80	40	40	40	80	80	80
D3	160	160	80	80	160	160	<40	<40	40	80	80	80	40	160	80	80	40	80	40	40	40	80	80	160
D4	160	320	80	160	160	160	40	40	80	80	80	80	80	160	160	160	80	160	80	80	40	160	160	320
D5	160	320	80	160	160	160	40	40	80	80	80	80	80	160	80	160	80	160	80	80	40	160	160	160
D6	160	320	80	80	160	320	<40	<40	40	80	40	80	40	80	80	160	40	40	40	40	40	80	80	160
D7	160	160	80	80	160	320	<40	<40	80	80	80	80	80	80	80	160	80	160	40	40	40	80	80	160
D8	640	640	320	640	1280	1280	160	80	160	320	160	320	160	640	320	320	160	320	160	160	160	320	320	320
D9	640	320	160	320	320	640	40	40	160	320	160	160	160	320	160	160	160	320	80	80	80	320	160	320
D10	640	640	320	320	640	640	80	40	320	320	320	320	160	640	320	320	320	320	160	160	160	640	320	640
D11	320	320	160	160	320	320	40	40	80	160	160	320	160	320	160	160	160	160	80	80	160	320	160	320
D12	320	320	160	160	160	320	40	40	80	160	80	160	80	160	160	160	80	160	40	80	80	160	160	160
D13	320	160	160	320	160	40	40	<40	80	160	80	80	80	160	160	160	80	80	40	80	80	320	160	160
D14	160	160	160	160	160	320	40	<40	160	160	80	80	40	80	80	160	40	80	40	40	40	80	160	160
D15	160	80	160	80	160	160	80	<40	160	160	80	80	80	80	80	80	40	40	40	40	40	40	160	80
D16	160	80	160	80	160	160	40	<40	80	40	80	40	40	80	80	80	40	40	40	<40	40	40	80	80
D17	160	80	80	40	160	80	40	<40	160	80	80	80	80	80	80	80	40	40	40	<40	40	80	80	80
D18	160	160	160	160	160	160	80	<40	160	160	160	160	160	160	160	160	80	160	80	80	80	160	160	160
D19	160	80	160	40	160	160	<40	<40	80	80	80	80	80	80	80	80	40	40	40	40	40	80	80	80
D20	40	40	40	40	80	80	<40	<40	40	40	<40	<40	<40	40	<40	40	<40	<40	<40	<40	<40	40	40	40
D21	160	80	80	80	160	160	40	<40	80	80	40	40	40	80	40	80	40	40	<40	<40	<40	40	80	80
D22	640	320	320	320	640	640	160	80	320	320	320	320	320	320	320	320	160	320	160	160	160	320	320	320
D23	80	40	40	<40	160	80	<40	<40	<40	<40	<40	40	<40	40	<40	<40	<40	<40	<40	<40	<40	<40	40	40
D24	80	40	40	40	80	80	<40	<40	80	40	40	40	40	40	40	40	<40	<40	<40	<40	<40	40	40	80

## Sheet: Table S6
Table S6: Summary NT50 values of Convalescent sera against SARS-COV2 isolates in HAT-24 and VeroE6.
	A2.2		B.1.319		Alpha		Beta		Gamma		Delta		Epsion		Zeta		Eta		Kappa		Lambda		C36
	HAT24	VeroE6	HAT24	VeroE6	HAT24	VeroE6	HAT24	VeroE6	HAT24	VeroE6	HAT24	VeroE6	HAT24	VeroE6	HAT24	VeroE6	HAT24	VeroE6	HAT24	VeroE6	HAT24	VeroE6	HAT24	VeroE6
AD015	640	1280	320	640	640	1280	<40	40	80	320	160	640	320	640	160	320	160	320	80	80	40	160	640	640
AD016	1280	1280	320	640	640	2560	320	1280	320	2560	640	1280	1280	1280	320	640	320	1280	1280	640	640	1280	640	640
AD10	640	640	320	320	320	1280	320	1280	320	640	320	1280	640	2560	160	640	320	640	640	320	320	640	640	320
AD062	160	320	160	320	80	320	<40	<40	<40	<40	<40	<40	<40	<40	160	320	80	320	80	40	<40	<40	320	320
AD007	640	320	160	320	160	320	80	80	160	320	160	160	160	320	160	160	160	160	160	160	160	160	320	320
AD008	640	640	320	320	320	640	80	80	320	320	160	320	320	640	160	320	320	320	160	160	160	320	640	320
AD043	640	640	160	640	640	640	<40	80	160	320	160	640	160	640	160	640	640	640	160	160	160	160	160	640
AD030	160	160	80	160	160	160	<40	<40	80	80	80	80	80	160	80	80	80	80	80	40	80	80	160	160
AD038	160	160	80	160	80	160	<40	<40	80	160	80	80	80	160	80	80	80	80	80	40	80	80	80	160
AD053	160	320	80	160	80	160	40	80	160	160	80	80	80	160	80	160	80	80	80	80	80	80	80	160
AD002	320	160	160	160	160	160	80	80	160	160	160	80	160	160	80	160	160	160	80	80	80	80	160	160
AD021	40	40	40	<40	40	40	<40	<40	40	40	<40	<40	40	40	<40	<40	40	<40	40	<40	<40	<40	40	40
AD026	80	80	80	80	80	80	<40	<40	40	40	40	40	40	80	40	40	80	40	80	<40	40	40	80	80
AD034	80	80	40	40	40	40	<40	<40	40	40	<40	40	40	40	<40	40	40	40	40	<40	<40	<40	40	80
AD039	80	40	40	40	40	40	<40	<40	40	80	<40	40	40	40	<40	40	40	40	40	<40	<40	<40	40	40
AD017	80	40	40	40	40	40	<40	<40	40	40	<40	<40	40	40	40	<40	40	<40	40	<40	<40	<40	40	40
AD040	40	40	<40	40	<40	<40	<40	<40	<40	40	<40	<40	<40	<40	<40	<40	<40	<40	40	<40	<40	<40	<40	<40
AD048	40	<40	40	40	40	<40	<40	<40	40	<40	40	<40	40	40	<40	<40	<40	<40	<40	<40	<40	<40	40	40
AD060	40	<40	40	<40	40	<40	<40	<40	40	<40	<40	<40	40	<40	<40	<40	40	<40	<40	<40	<40	<40	<40	40
AD036	<40	<40	<40	<40	<40	<40	<40	<40	<40	<40	<40	<40	<40	<40	<40	<40	<40	<40	40	<40	<40	<40	<40	<40
AD046	40	<40	<40	<40	<40	<40	<40	<40	<40	<40	<40	<40	<40	<40	<40	<40	<40	<40	<40	<40	<40	<40	<40	<40
AD067	40	<40	40	40	40	<40	<40	<40	<40	<40	<40	<40	<40	<40	<40	<40	<40	<40	40	<40	<40	<40	<40	<40
AD313	40	<40	<40	40	40	40	<40	<40	40	<40	<40	40	40	40	<40	<40	40	40	40	40	40	<40	<40	40
